# Supplementary material for: Cryptic invasion suggested by a cytogeographic analysis of the halophytic Puccinellia distans complex (Poaceae) in Central Europe
Source: Front Plant Sci. 2023 Oct 19;14:1249292. doi: 10.3389/fpls.2023.1249292 (PMC10620967; doi:10.3389/fpls.2023.1249292)
Supplement: Supplementary file 3 [file Table_1.xlsx]

## Sheet: Localities
Supplementary Table 1. List of the localities of the Puccinellia distans agg. populations used in this study together with their cytotype compositions detected by flow cytometry. Individuals with counted chromosomes and their chromosome counts are denoted as superscripts. The geographic coordinates are presented in WGS 84 format (decimal degrees).
Population	Latitude	Longitude	Locality	Collection.date	Habitat	unassigned	2x	4xA	4xB	5x	6xA	6xB	6xC	7x
PU1	48.2319	17.8801	Slovakia, Nitra region, Šala district, Mocenok: saline habitat W of the village, E of the Hornokrálovský kanál channel	2018-05-21	natural	0	0	0	0	0	0	4	3	0
PU2	48.2213	17.8978	Slovakia, Nitra region, Šala district, Mocenok: saline habitat W of the village, at the locality Síky	2018-05-21	natural	5	0	0	0	0	4	1	1	0
PU3	48.1174	18.0281	Slovakia, Nitra region, Nové Zámky district, Jatov: saline habitat S of the village, between the Jatovský kanál channel and the road nr. 75	2018-05-21	natural	0	0	0	0	0	3	9 42	0	0
PU4	48.0957	18.0529	Slovakia, Nitra region, Nové Zámky district, Tvrdošovce: saline habitat E of the Ráczovo jazierko lake	2018-05-21	natural	0	0	2	0	1	0	0	0	0
PU5	48.1513	18.1263	Slovakia, Nitra region, Nové Zámky district, Komjatice: saline habitat SSE of the Ružový dvor locality	2018-05-22	natural	0	0	9	0	0	0	0	0	0
PU6	47.8665	18.5685	Slovakia, Nitra region, Nové Zámky district, Šarkan: saline habitat near the road S of the bridge across the Paríž brook, S of the Diva settlement	2018-05-22	natural	0	0	0	0	0	0	2	2	0
PU7	47.8797	18.6453	Slovakia, Nitra region, Nové Zámky district, Kamenín: N part of the Kamenínske slanisko saline pasture	2018-05-22	natural	2	0	0	0	0	0	2	4	0
PU8	47.8755	18.6467	Slovakia, Nitra region, Nové Zámky district, Kamenín: S part of the Kamenínske slanisko saline pasture	2018-05-22	natural	1	0	0	0	0	0	5	3	0
PU9	47.7959	18.4316	Slovakia, Nitra region, Komárno district, Búc: saline habitat at the Búcske slanisko locality	2018-05-22	natural	0	0	4	0	0	0	0	0	0
PU10	47.7718	18.0007	Slovakia, Nitra region, Komárno district, Zlatná na Ostrove: saline habitat at the Pavelské slanisko locality	2018-05-22	natural	0	0	8	0	0	0	0	1	0
PU11	47.7671	17.9396	Slovakia, Nitra region, Komárno district, Zlatná na Ostrove: saline habitat W of the locality Nový dvor	2018-05-22	natural	0	0	5	0	0	0	0	0	0
PU12	47.4268	16.9336	Hungary, Gyõr-Moson-Sopron county, Soproni district, Csáfordjánosfa: saline habitat NW of the village, between the Kócsod brook and the road nr. 8617 (near the locality Csérimajor)	2018-05-23	natural	0	0	9	0	0	0	0	0	0
PU13	47.6367	17.7319	Hungary, Gyõr-Moson-Sopron county, Gyõri district, Töltéstava: saline meadow N of the village	2018-05-23	natural	1	0	0	0	0	0	1	7	0
PU14	47.6346	17.6647	Hungary, Gyõr-Moson-Sopron county, Gyõri district, Gyõrújbarát: road verge at the petrol station at the exit nr. 119 of the M1 highway	2018-05-23	secondary	1	0	0	0	0	0	0	4	1
PU15	47.2219	17.2181	Hungary, Veszprém county, Devecseri district, Nagypirit: saline habitat between the river Marcal and the Fövenyes-árok channel NNW of the village	2018-05-23	natural	0	0	4	0	0	0	0	0	0
PU16	47.1161	17.1348	Hungary, Vas county, Celldömölki district, Jánosháza: verge of the road nr. 84 S of the the junction with the road nr. 8	2018-05-23	secondary	0	0	0	0	0	0	0	14	0
PU17	47.1058	16.9573	Hungary, Vas county, Vasvári district, Szemenye: verge of the road nr. 8 E of the village, ESE of the Csipkerek Vadászház hunting lodge	2018-05-23	secondary	2	0	0	0	0	0	0	7 42	0
PU18	46.9853	18.5519	Hungary, Fejér county, Sárbogárdi district, Sárkeresztúr: SE shore of the Sárkány lake	2018-05-24	natural	0	0	8	0	0	0	0	0	0
PU19	46.7959	19.1704	Hungary, Bács-Kiskun county, Kiskõrösi district, Fülöpszállás: saline shore at the W edge of the lake Kelemen-szék	2018-05-24	natural	0	0	0	0	0	0	1	8 42	0
PU20	46.8247	19.2293	Hungary, Bács-Kiskun county, Kiskõrösi district, Fülöpszállás: saline habitat at the E edge of the village (E of the Attila street)	2018-05-24	natural	1	0	0	0	0	0	1	7	0
PU21	46.829	20.1328	Hungary, Jász-Nagykun-Szolnok county, Kunszentmártoni district, Csépa: saline shore of a nameless lake N of the village (between the Bogarasi street and the livestock farm)	2018-05-24	natural	0	0	0	0	0	0	0	2	1
PU22	47.0194	20.0536	Hungary, Bács-Kiskun county, Tiszakécskei district, Tiszakécske: saline habitat between the village Tiszajeno and the road nr. 4612, next to the Csukás brook	2018-05-24	natural	0	0	12	0	0	0	0	0	0
PU24	47.573	21.257	Hungary, Hajdú-Bihar county, Balmazújvárosi district, Nagyhegyes: saline habitat at the bird watching tower at the road 33 (80th km)	2018-05-24	natural	0	0	13 28	0	1	0	0	0	0
PU25	47.5721	21.2579	Hungary, Hajdú-Bihar county, Balmazújvárosi district, Nagyhegyes: road verge at the bird watching tower at the road 33 (80th km)	2018-05-24	secondary	2	0	9	1	0	0	0	0	0
PU26	47.5602	20.9713	Hungary, Hajdú-Bihar county, Tiszafüredi district, Egyek: saline habitat next to the road nr. 33 ENE of the Kócsújfalu housing estate	2018-05-25	natural	0	0	7	0	0	0	0	0	0
PU27	47.6823	21.1606	Hungary, Hajdú-Bihar county, Balmazújvárosi district, Tiszacsege: saline habitat at the S edge of the road nr. 3316 E of the village	2018-05-25	natural	0	0	7	1 28	0	0	0	0	0
PU28	47.5844	21.3477	Hungary, Hajdú-Bihar county, Balmazújvárosi district, Balmazújváros: saline habitat S of the town	2018-05-25	natural	0	0	4	0	0	0	0	0	0
PU29	47.9596	21.4217	Hungary, Szabolcs-Szatmár-Bereg county, Tiszavasvári district, Tiszavasvári: drained bottom of the saline lake Fehér-Szik (S edge)	2018-05-25	natural	0	0	10	1	0	0	0	0	0
PU30	48.0074	21.513	Hungary, Szabolcs-Szatmár-Bereg county, Tiszavasvári district, Tiszaeszlár: saline habitat E of the village next to the road 36123, in the vicinity of a drainage channel	2018-05-25	natural	0	0	12	0	0	0	0	0	0
PU31	47.9603	21.5304	Hungary, Szabolcs-Szatmár-Bereg county, Nyíregyházi district, Nagycserkesz: road edge at the Tiszalök road junction of the roads nr. 36 and 3612 W of the village	2018-05-25	secondary	0	0	0	0	0	0	0	13	0
PU32	47.9132	21.6284	Hungary, Szabolcs-Szatmár-Bereg county, Nyíregyházi district, Nyíregyháza, Felsõsima: saline meadow at the S edge of the Nagyszéki lake, at the Nagylapos-Bogárházi channel	2018-05-25	natural	0	0	9	0	2 35,35	0	0	1	0
PU33	47.8117	21.5115	Hungary, Hajdú-Bihar county, Hajdúböszörményi district, Hajdúdorog: saline habitat at the E edge of the town, between the Agyag and Balogh Sándor streets	2018-05-25	natural	1	0	2	0	0	0	0	0	0
PU34	47.1895	19.8769	Hungary, Pest county, Ceglédi district, Cegléd: saline habitat NNE of the town, at the S edge of the M4 highway	2018-05-26	natural	1	0	3	0	0	0	0	0	0
PU35	46.5828	19.9819	Hungary, Csongrád-Csanád county, Kisteleki district, Pusztaszer: saline habitat at the NE edge of the Fülöp lake	2018-05-26	natural	0	0	0	0	0	0	0	1	1
PU36	46.5224	20.04	Hungary, Csongrád-Csanád county, Kisteleki district, Ópusztaszer: saline habitat NNW of the village, between the Kis-Zer tanya road and Büdös-szék lake	2018-05-26	natural	0	0	0	0	0	0	1	9	0
PU37	47.0236	19.1641	Hungary, Bács-Kiskun county, Kunszentmiklósi district, Kunszentmiklós: saline habitat by the road nr. 5205 E of the town	2018-05-26	natural	2	0	0	0	0	0	0	4 42,42	7 49
PU38	47.7516	16.8675	Austria, Burgenland, Neusiedl district, Apetlon: saline habitat S of the parking lot Parkplatz Lange Lacke	2018-05-27	natural	1	0	7	0	5	0	0	0	0
PU39	47.7659	16.8376	Austria, Burgenland, Neusiedl district, Apetlon: saline habitat at the S edge of the Darscho lake	2018-05-27	natural	0	0	14	0	0	0	0	0	0
PU40	47.7914	16.8785	Austria, Burgenland, Neusiedl district, Apetlon: saline habitat at the S shore of the Kühlbrunnlacke lake	2018-05-27	natural	0	0	11	0	0	0	0	0	0
PU41	47.7983	16.8723	Austria, Burgenland, Neusiedl district, Apetlon: saline habitat at the SE shore of the Standlacke lake	2018-05-27	natural	0	0	7	0	0	0	0	0	0
PU42	47.871	16.8456	Austria, Burgenland, Neusiedl district, Podersdorf am See: saline habitat 1.80 km NEbN of the St. Katharina church in the village	2018-05-27	natural	0	0	13	0	0	0	0	0	0
PU43	47.8349	16.8267	Austria, Burgenland, Neusiedl district, Podersdorf am See: saline habitat by an agricultural road 2.53 km SbW of the St. Katharina church in the village	2018-05-27	secondary	1	0	0	0	0	0	0	5	0
PU44	47.838	16.8291	Austria, Burgenland, Neusiedl district, Podersdorf am See: saline habitat in a small wetland 2.16 km SbW of the St. Katharina church in the village	2018-05-27	natural	0	0	8	0	0	0	0	0	0
PU45	47.7525	16.8671	Austria, Burgenland, Neusiedl district, Apetlon: verge of the road L205, by the parking lot Parkplatz Lange Lacke	2018-05-27	secondary	0	0	1	0	0	0	0	6	0
PU46	47.7417	16.9306	Austria, Burgenland, Neusiedl district, Wallern im Burgenland: verge of the road B51 1.99 km NbW of the St. Matthew church in the village	2018-05-27	secondary	0	0	0	0	0	0	0	3	0
PU47	48.9641	16.9397	Czechia, South Moravian region, Hodonín district, Terezín: saline habitat 1.25 km NbW of the church by the cemetery in the village	2018-05-27	natural	1	0	0	0	0	0	0	14	1
PU48	48.9647	16.9409	Czechia, South Moravian region, Hodonín district,Terezín: verge of the road nr. 380 1.30 km NbW of the church by the cemetery in the village	2018-05-27	secondary	0	0	0	0	0	0	0	12	0
PU49	48.776	16.7026	Czechia, South Moravian region, Breclav district, Sedlec u Mikulova: saline pasture 430 m ENE of the railway station	2018-05-27	natural	0	0	0	0	0	0	0	8	0
PU50	48.7755	16.6985	Czechia, South Moravian region, Breclav district, Sedlec u Mikulova: saline pasture 140 m NE of the railway station	2018-05-27	natural	1	0	0	0	0	0	0	7	0
PU52	44.6304	10.3275	Italy, Emilia-Romagna region, Parma province, Lesignano de' Bagni: mineral springs at the Parco dei Barboj (S part of the parking lot), S of the hamlet Fossola	2018-06-10	natural	0	0	0	10 28,28,28,28,28	0	0	0	0	0
PU53	44.5126	10.8217	Italy, Emilia-Romagna region, Modena province, Fiorano Modenese: mineral springs Salse Di Nirano	2018-06-11	natural	0	15 14	0	0	0	0	0	0	0
PU54	44.4396	10.8843	Italy, Emilia-Romagna region, Modena province, Marano sul Panaro: mineral springs Salse di Ospitaletto, N of the hamlet Ospitaletto	2018-06-11	natural	0	15	0	0	0	0	0	0	0
PU55	41.5362	15.8995	Italy, Apulia region, Foggia province, Manfredonia: Corso del Sole, salt marsh at the N edge of the Palude Ippocampo	2018-06-17	natural	2	0	0	0	0	0	0	8 42	0
PU57	51.4904	11.6799	Germany, Saxony-Anhalt, Mansfeld-Südharz district, Aseleben: saline habitat at the locality called Salzwiesen bei Aseleben	2018-07-07	natural	0	8 14	0	0	0	0	0	0	0
PU58	51.8485	11.5516	Germany, Saxony-Anhalt, Salzlandkreis district, Hecklingen: saline habitat at the locality Salzstelle bei Hecklingen E of the village	2018-07-07	natural	0	13	0	0	0	0	0	0	0
PU59	52.0274	11.5702	Germany, Saxony-Anhalt, Börde district, Sülldorf: saline habitat at the locality called Salzstellen bei Sülldorf	2018-07-07	natural	0	10	0	0	0	0	0	5	0
PU60	52.0262	11.5678	Germany, Saxony-Anhalt, Börde district, Sülldorf: road verge in the Bahrendorfer Straße at the NE edge of the village	2018-07-07	secondary	0	0	0	0	0	0	0	7	1
PU61	50.4698	13.5974	Czechia, Ústecký region, Most district, Malé Brezno: fallow land in the locality Bylany u Mostu	2018-07-07	natural	0	0	0	0	0	0	0	13	0
PU62	51.287	12.6396	Germany, Saxony, Leipzig district, Ammelshain: road verge at the exit 30 of the A14 highway	2018-07-07	secondary	0	0	0	0	0	0	0	11	0
PU63	50.4652	13.6095	Czechia, Ústecký region, Most district, Malé Brezno: road verge at the junction of the road nr. 27 and a secondary road leading to Vysoké Brezno	2018-07-07	secondary	0	0	0	0	0	0	0	11 42,42	0
PU64	48.8136	16.8992	Czechia, South Moravian region district, Břeclav, Ladná: concrete area NE of the petrol station by the D2 highway	2018-07-15	secondary	1	0	0	0	0	0	0	3	0
PU66	46.1819	21.1199	Romania, Arad county, Sederhat: road verge at the parking lot near the exit of the A1 highway	2019-05-11	secondary	4	0	0	0	0	0	3	9 42	0
PU67	46.4199	21.3724	Romania, Arad county, Sânmartin: saline habitat E of the village	2019-05-11	natural	2	0	0	0	0	1 42	8	1	0
PU68	46.5152	21.4957	Romania, Arad county, Chisineu-Cris: saline habitat at the LPG filling station by the road DN79A	2019-05-11	natural	0	0	0	0	0	2	8 42	0	0
PU69	46.8529	21.6518	Romania, Bihor county, Mărțihaz: road verge S of the village	2019-05-11	secondary	1	0	0	0	0	0	4	6 42	0
PU70	46.9841	21.8658	Romania, Bihor county, Nojorid: verge of the road DN79 SW of the village	2019-05-11	secondary	1	0	0	0	0	0	1	10 42	0
PU72	46.588	23.7916	Romania, Cluj county, Turda: saline habitat by the Aleea Durgãului road, opposite the Lacul Dulce lake	2019-05-12	natural	1	0	0	0	0	0	2	4	0
PU73	47.1094	21.8454	Romania, Bihor county, Sântion: saline habitat NNE of the village, S of the crossing of the railroad and the secondary road leading to the village	2019-05-12	natural	2	0	0	0	0	0	4	2	0
PU75	44.3563	12.31	Italy, Emilia-Romagna region, Ravenna province, Ravenna: saline habitat near the estuary of the river Bevanno, near the observation tower at the confluence of the Bevanno and the Ghiaia channel	2019-05-23	natural	1	0	0	1	0	0	1	3 42	1
PU76	44.3591	12.3226	Italy, Emilia-Romagna region, Ravenna province, Ravenna: saline habitat near the estuary of the river Bevanno, in the meander of the river	2019-05-23	natural	2	0	0	2	0	0	3 42	2	0
PU77	44.2564	12.3358	Italy, Emilia-Romagna region, Ravenna province, Cervia: saline habitat at the road Via Salara Statale, between the channel Canale di Cervia and the junction of Via Salara Statale and Via Romea Sud	2019-05-24	natural	1	0	0	0	0	0	11 42	0	0
PU78	44.63	10.3264	Italy, Emilia-Romagna region, Parma province, Lesignano de' Bagni: mineral springs at the Parco dei Barboj (at the playground), S of the hamlet Fossola	2019-05-25	natural	0	0	0	11 28	0	0	0	0	0
PU79	43.3477	4.792	France, Bouches-du-Rhône department, Arrondissement of Istres district, Port-Saint-Louis-du-Rhône: salt marsh by the Plage de Piémanson beach	2019-06-01	natural	1	0	0	0	0	0	1	0	0
PU80	50.7516	9.29271	Germany, Hesse, Gießen district, Alsfeld: verge of the road B62 E of the town	2020-05-25	secondary	2	0	0	0	0	0	0	9 42	0
PU81	51.3694	11.2797	Germany, Thuringia, Kyffhäuserkreis district, Artern: saline habitat W of the Am Westbahnhof street	2020-05-29	natural	0	3	0	0	0	0	0	0	0
PU82	51.4902	11.6799	Germany, Saxony-Anhalt, Mansfeld-Südharz district, Aseleben: saline habitat at the locality called Salzwiesen bei Aseleben	2020-05-30	natural	0	17	0	0	0	0	0	0	0
PU83	51.4873	11.7614	Germany, Saxony-Anhalt, Saalekreis district, Langenbogen: saline habitat 1.04 km WNW of the church in the village	2020-05-30	natural	0	13	0	0	0	0	0	0	0
PU84	52.0716	10.9188	Germany, Lower Saxony, Helmstedt district, Jerxheim: saline habitat in the locality Salzwiese Seckertrift SE of the village	2020-05-30	natural	0	16	0	0	0	0	0	0	0
PU85	52.1008	10.8112	Germany, Lower Saxony, Wolfenbüttel district, Barnstorf: saline habitat at the edge of the football field in the Teichwiese street	2020-05-30	natural	0	17	0	0	0	0	0	0	0
PU86	52.09	10.8217	Germany, Lower Saxony, Helmstedt district, Watenstedt: saline habitat in the vicinity of the mineral springs Soltau Quelle	2020-05-30	natural	0	8	0	0	0	0	0	0	0
PU87	47.9515	16.8221	Austria, Burgenland, Neusiedl district, Neusiedl am See: saline habitat in the golf resort Öko-Golf-Neusiedler Csarda (Obere Wiesen 1)	2020-06-06	natural	0	0	11	0	0	0	0	0	0
PU88	47.9494	16.8134	Austria, Burgenland, Neusiedl district, Neusiedl am See: tracks of an agricultural road WSW of the golf resort Öko-Golf-Neusiedler Csarda	2020-06-06	natural	1	0	0	0	0	0	0	9	0
PU89	47.8387	16.6832	Austria, Burgenland, Eisenstadt-Umgebung district, Oggau am Neusiedler See: saline habitat at the NE edge of the village, by the Seegasse street	2020-06-06	natural	0	0	6	0	0	0	0	0	0
PU90	50.382	8.70646	Germany, Hesse, Darmstadt district, Nieder-Mörlen: road verge at the highway exit W of the village	2020-06-04	secondary	0	0	0	0	0	0	0	14 42	0
PU91	50.3584	8.74932	Germany, Hesse, Darmstadt district, Bad Nauheim: in the vicinity of the graduation tower (Gradierwerk IV) in the Am Gradierwerk street	2020-06-04	secondary	1	0	0	0	0	12 42	2	0	0
PU92	50.3799	8.75484	Germany, Hesse, Darmstadt district, Steinfurth: road verge in the Hofgut Löwenthal residential road	2020-06-04	natural	0	0	0	0	0	11 42	1	0	0
PU93	50.4671	8.76373	Germany, Hesse, Gießen district, Münzenberg: saline habitat 970 m ENE of the church in Ober-Hörgern	2020-06-04	natural	0	0	0	0	0	11 42	1	0	1 49
PU94	50.6599	9.67643	Germany, Hesse, Kassel district, Michelsrombach: verge of the road L3176 by the exit 90 of the A7 motorway	2020-06-05	secondary	0	0	0	0	0	0	0	15	0
PU95	50.33	9.55379	Germany, Hesse, Darmstadt district, Ahlersbach: road verge NNW of the village, S of the Ahlersbacher Weiher fishpond	2020-06-05	secondary	1	0	0	0	0	0	0	15	0
PU96	47.8684	16.8471	Austria, Burgenland, Neusiedl district, Podersdorf am See: saline habitat 1.66 km NE of the St. Katharina church in the village	2020-06-13	natural	0	0	9	1	1	0	0	0	0
PU97	47.7476	16.8787	Austria, Burgenland, Neusiedl district, Apetlon: drained bottom of the Götschlacke lake E of the village	2020-06-14	natural	0	0	0	0	0	0	0	14	0
PU98	48.0374	16.8169	Austria, Lower Austria, Bruck an der Leitha district, Rohrau: verge of the road B211 by the road junction of B211 and the A4 highway	2020-06-14	secondary	0	0	0	0	0	0	0	10	0
PU99	54.1581	13.6929	Germany, Mecklenburg-Vorpommern, Vorpommern-Greifswald district, Spandowerhagen: salt marsh 1.58 km N of the church (Bethlehemkirche) in the village	2020-06-22	natural	0	0	0	0	0	0	0	9	0
PU100	53.9959	13.5877	Germany, Mecklenburg-Vorpommern, Vorpommern-Greifswald district, Züssow: verge of the road B111 NE of the village	2020-06-22	secondary	1	0	0	0	0	0	0	10	0
PU101	54.1632	13.3964	Germany, Mecklenburg-Vorpommern, Vorpommern-Greifswald district, Groß Karrendorf: salt marsh 2.06 km NEbE of the bus station in the settlement	2020-06-22	natural	0	0	0	0	0	0	0	8	0
PU102	54.1538	13.3287	Germany, Mecklenburg-Vorpommern, Vorpommern-Greifswald district, Mesekenhagen: verge of the road K2 NE of the village	2020-06-22	secondary	0	0	0	0	0	0	0	9	0
PU103	54.417	12.7955	Germany, Mecklenburg-Vorpommern, Vorpommern-Rügen district, Zingst: salt marsh S of the Westhof hamlet	2020-06-23	natural	0	0	0	0	0	0	0	12 42	0
PU104	54.3348	12.3822	Germany, Mecklenburg-Vorpommern, Vorpommern-Rügen district, Wustrow: salt marsh E of the Wustrow, Leuchtfeuer bus station	2020-06-23	natural	0	0	0	0	0	0	0	9	0
PU105	54.2874	12.3539	Germany, Mecklenburg-Vorpommern, Vorpommern-Rügen district, Dierhagen Dorf: verge of the road L21 at the SW edge of the village	2020-06-23	secondary	0	0	0	0	0	0	0	8	0
PU106	54.2301	12.4155	Germany, Mecklenburg-Vorpommern, Vorpommern-Rügen district, Ribnitz-Damgarten: verge of the road B105, at the crossing with the An der Hohen Warthe street	2020-06-23	secondary	0	0	0	0	0	0	0	5	0
PU107	54.2987	12.8678	Germany, Mecklenburg-Vorpommern, Vorpommern-Rügen district, Kummerow: verge of the road B105 E of the Kummerow Heide bus station	2020-06-23	secondary	0	0	0	0	0	0	0	5	0
PU108	54.071	13.2108	Germany, Mecklenburg-Vorpommern, Vorpommern-Rügen district, Klein Bisdorf: road verge at the exit 25 of the A20 highway	2020-06-23	secondary	0	0	0	0	0	0	0	8	0
PU109	52.8847	13.7052	Germany, Brandenburg, Barnim district, Werbellin: verge of the A11 highway S of the village	2020-06-23	secondary	0	0	0	0	0	0	0	6	0
PU110	45.8946	23.8209	Romania, Sibiu county, Apoldu de Jos: saline habitat N of the A1 highway, NW of the village	2020-07-10	natural	3	0	0	0	0	0	6	1	0
PU111	45.9195	23.7213	Romania, Alba county, Cunța: verge of the road DJ106I at the exit of the highway A1	2020-07-10	secondary	1	0	0	0	0	0	1	12	0
PU112	46.2468	23.8702	Romania, Alba county, Ocnișoara: saline habitat after the end of the street Strada Vatra Ocnișoarei	2020-07-10	natural	0	0	12 28	0	0	0	0	0	0
PU113	45.87	24.0627	Romania, Sibiu county, Ocna Sibiului: saline springs in the Salina Romana recreational area, S of the Lacul Verde lake	2020-07-10	natural	2	0	0	0	0	0	0	6 42	3
PU114	45.8819	22.3996	Romania, Hunedoara county, Holdea: verge of the road DN68A SE of the village	2020-07-11	secondary	0	0	0	0	0	0	1	14	0
PU115	45.2685	21.2796	Romania, Timișoara - Moravița county, Moravița: saline habitat bewteen Moravița and Dejan	2020-07-11	natural	1	0	0	0	0	0	4	6	0
PU116	45.6929	21.176	Romania, Timiș county, Timișoara: verge of the road DN59 in the industrial park Parcul Industrial Incontro	2020-07-11	secondary	1	0	0	0	0	0	1	9	0
PU117	45.952	20.1785	Serbia, Vojvodina province, North Banat district, Coka: saline habitat ENE of the village	2020-07-11	natural	1	0	0	0	0	0	0	4	1 49
PU118	45.6097	20.2198	Serbia, Vojvodina province, Central Banat district, Novi Becej: saline habitat at the SE shore of the Slano Kopovo lake	2020-07-11	natural	0	0	0	0	0	1	5	0	0
PU119	45.5127	20.2944	Serbia, Vojvodina province, Central Banat district, Melenci: saline habitat at the SW shore of the Rusanda lake	2020-07-11	natural	2	0	0	0	0	0	2	0	0
PU120	46.8272	17.8522	Hungary, Somogy, Siófoki district,Balatonszárszó: verge of the feeder road between the town and the M7 highway (at the exit nr. 126)	2020-07-12	secondary	0	0	0	0	0	0	0	4	0
PU121	46.8317	17.8248	Hungary, Somogy, Siófoki district, Balatonszárszó: saline lawn at the shore of the Balaton lake next to the Vízpart street	2020-07-12	natural	0	0	0	0	0	0	1	2	0
PU122	50.6536	15.9685	Czechia, Hradec Králové region, Trutnov district, Bernartice: verge of the road nr. 16 N of the village	2020-07-24	secondary	0	0	0	0	0	0	0	5	0
PU123	50.4143	8.98524	Germany, Hesse, Darmstadt district, Nidda: mineral springs in the Bad Salzhausen park	2020-08-01	natural	0	0	0	0	0	1	0	4	0
PU124	50.46	9.59251	Germany, Hesse, Kassel district, Landkreis Fulda, Neuhof: artificial saline habitat by a potash dump NW of the village	2020-08-01	secondary	0	0	0	0	0	0	0	1	0
PU125	50.8444	9.93793	Germany, Hesse, Kassel district, Heimboldshausen: potash dump by the junction of the Ausbacher Straße and Nipper Straße streets	2020-08-02	secondary	0	0	0	0	0	0	1	0	0
PU126	50.8292	10.1323	Germany, Thuringia, Wartburgkreis district, Merkers: saline habitat 1.34 km ENE of the church in the village	2020-08-02	natural	0	0	0	0	0	0	1	3	0
PU127	50.8051	10.2653	Germany, Thuringia, Wartburgkreis district, Bad Salzungen: saline habitat 360 m NbW of the Ettmarshausen bus station	2020-08-02	natural	0	0	0	0	0	0	0	1	0
PU128	50.8039	10.2654	Germany, Thuringia, Wartburgkreis district, Bad Salzungen: saline habitat 220 m NNW of the Ettmarshausen bus station	2020-08-02	natural	0	0	0	0	0	0	0	3	0
PU129	50.4195	8.84914	Germany, Hesse, Darmstadt district, Berstadt: road verge at the exit nr. 37 by the A45 highway	2020-08-03	secondary	1	0	0	0	0	0	0	3	0
PU130	50.4176	8.95834	Germany, Hesse, Darmstadt district, Nidda: verge of the road B455 by the railroad crossing W of Bad Salzhausen	2020-08-03	secondary	0	0	0	0	0	0	0	1	0
PU131	50.4674	8.76266	Germany, Hesse, Gießen district, Münzenberg: saline habitat 910 m ENE of the church in Ober-Hörgern	2020-08-03	secondary	0	0	0	0	0	0	0	2	0
PU132	50.4672	8.7637	Germany, Hesse, Gießen district, Münzenberg: road verge 970 m ENE of the church in Ober-Hörgern	2020-08-03	natural	0	0	0	0	0	1	0	0	0
PU133	50.381	8.75714	Germany, Hesse, Darmstadt district, Wisselsheim: road verge in the vicinity of the Am Eichberg street	2020-08-03	secondary	0	0	0	0	0	0	0	1	0
PU134	42.6892	11.0056	Italy, Tuscany region, Grosseto province: Principina a Mare: salt marsh S of the village	2020-08-13	natural	1	0	0	0	0	0	2	0	0
PUx1	50.4172	6.43753	Germany, North Rhine-Westphalia, Cologne district, Schnorrenberg: verge of the road L17 790 m SWbS of the chapel in the village	2020-07-15	secondary	0	0	0	0	0	0	0	1	0
PUx2	50.4834	6.69165	Germany, North Rhine-Westphalia, Cologne district, Engelgau: road verge at the parking lot 1.52 km SE of the St. Luzia church in the village	2020-07-20	secondary	0	0	0	0	0	0	0	3	0
PUx3	47.451	15.3408	Austria, Styria, Bruck-Mürzzuschlag district, Kapfenberg: road verge by the Raststation Kapfenberg parking lot (highway S6)	2020-08-01	secondary	0	0	0	0	0	0	0	4	0
PUx4	47.3947	15.0392	Austria, Styria, Leoben district, St. Peter-Freienstein: road verge in the parking lot by the supermarket near the junction of the Schloßweg and Hauptstraße streets	2020-08-01	secondary	0	0	0	0	0	0	0	6	0
PUx5	47.6486	15.8579	Austria, Lower Austria, Bezirk Neunkirchen district, Schottwien: road verge at the petrol station (by the Rastplatz Schottwien parking lot) by the S6 highway	2020-08-01	secondary	0	0	0	0	0	0	0	4	0
